# Supplementary material for: Chemopreventive activity of GEN-27, a genistein derivative, in colitis-associated cancer is mediated by p65-CDX2-β-catenin axis
Source: PubMed Central journal article supplement (PMC4951256; doi:10.18632/oncotarget.7554), 2016-02-21
Supplement: oncotarget-07-17870-s001.pdf [file oncotarget-07-17870-s001.pdf]

## Chemopreventive activity of GEN-27, a genistein derivative, in colitis-associated cancer is mediated by p65-CDX2- $\beta$ -catenin axis

### Supplementary Material

#### Supplementary Table 1

List of primers used in this study

|                 | Sence primer          | Antisence primer      |
|-----------------|-----------------------|-----------------------|
| CHIP-PCR        |                       |                       |
| CDX2 silencer   | TCGTTAATCACGGAAGGCCG  | GGAGCAGACCTCACCATGC   |
| APC enhancer    | GTTGGTGAGGAAGGTGAAGC  | CGAGAACTGAGGGTGGTACAG |
| AXIN2 enhancer  | GGAGCAGTAAAAGGCCGTAA  | CCAAACCATTGAAGCCCTTA  |
| Real time PCR   |                       |                       |
| Mouse-Cyclin D1 | CCCCTTGGGGACATGTTGTT  | GCTCCCTACTCTCAGGGTGA  |
| Mouse-PCNA      | AGGGTTGGTAGTTGTCGCTG  | CAAACATGGTGGCGGAGTTG  |
| Mouse-c-Myc     | CTGTGGAGAAGAGGCAAACC  | TTGTGCTGGTGAGTGGAGAC  |
| mouse-CDX2      | GCAGAGCCAAGGAGAGGAA   | GGAGGTCACAGGACTCAAGG  |
| mouse-APC       | TTGGACTCACCGCATCACTA  | CCTGGAAAGGTCAACATCGT  |
| mouse-AXIN2     | CCATCAGCAGTGTCATACCC  | CTTCGTCTGTGTTTGGTCA   |
| Human-Cyclin D1 | CACACGGACTACAGGGGAGT  | GATGGTTTCCACTTCGCAGC  |
| Human-PCNA      | CAGAGCTCTTCCCTTACGCA  | GTCCTTGAGTGCCTCCAACA  |
| Human-c-Myc     | CCTCCACTCGGAAGGACTATC | TTCGCCTCTTGACATTCTCC  |
| Human-CDX2      | CAGACTACCATCCGCACCA   | CATCCACTCGCACAGGTTC   |
| Human-APC       | GCTCAAACCAAGCGAGAAGT  | AGCATCTGGAAGAACCTGGA  |
| Human-AXIN2     | AGAGAGACCACGCCGATTG   | GGGAGGCAAGTCACCAACAT  |

Supplementary Table 2  
Composition of diets

| Formula (in g/kg)               | AIN93G  | GEN-27 5mg/kg | GEN-27 15mg/kg | GEN-27 45mg/kg | GEN 45mg/kg | ASP 45mg/kg |
|---------------------------------|---------|---------------|----------------|----------------|-------------|-------------|
| Casein                          | 200     | 200           | 200            | 200            | 200         | 200         |
| L-Cystine                       | 300     | 300           | 300            | 300            | 300         | 300         |
| Corn Starch                     | 397.486 | 397.486       | 397.486        | 397.486        | 397.486     | 397.486     |
| Maltodextrin                    | 132     | 132           | 132            | 132            | 132         | 132         |
| Sucrose                         | 100     | 100           | 100            | 100            | 100         | 100         |
| Soybean Oil                     | 70      | 70            | 70             | 70             | 70          | 70          |
| Cellulose                       | 50      | 50            | 50             | 50             | 50          | 50          |
| Mineral Mix, AIN-93G-MX (94046) | 35      | 35            | 35             | 35             | 35          | 35          |
| Vitamin Mix, AIN-93-VX (94047)  | 10      | 10            | 10             | 10             | 10          | 10          |
| Choline Bitartrate              | 2.5     | 2.5           | 2.5            | 2.5            | 2.5         | 2.5         |
| TBHQ, antioxidant               | 0.014   | 0.014         | 0.014          | 0.014          | 0.014       | 0.014       |
| GEN-27                          | 0       | 0.005         | 0.015          | 0.045          | 0           | 0           |
| GEN                             | 0       | 0             | 0              | 0              | 0.045       | 0           |
| ASP                             | 0       | 0             | 0              | 0              | 0           | 0.045       |

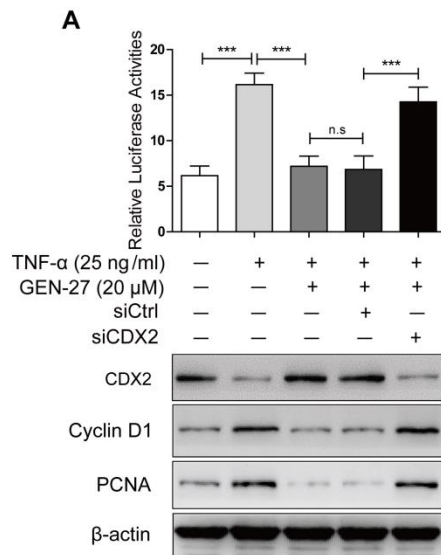

**B**

| Regions                              | Sequence                                                    |
|--------------------------------------|-------------------------------------------------------------|
| CDX2 silencer region (-268 to -224)  | 5'-CGCACGCCAGCCTGTGGCG <b>GGTCTTCCCG</b> CCTCTGCAGCCTAGT-3' |
| APC enhancer region (-572 to -528)   | 5'-AGGAAGGTGAAGCACT <b>CAGTGC</b> CTTCTCGGGCCTCGGCGCCCC-3'  |
| AXIN2 enhancer region (-696 to -652) | 5'-AGGCGGAGGGAGGAGCCGC <b>CATAA</b> CTGGAGGCAGAGTCCTTAGC-3' |

NOTE. Bold letters in the CDX2 silencer region represent the NF-κB binding site and bold letters in the APC and AXIN2 enhancer region represent the CDX2 binding sites.

Figure S1. Knock-down of CDX2 abolishes GEN-27's inhibitory effect on β-catenin activity in the presence of TNF-α. (A) Effects of the indicated factors on β-catenin transcriptional activity of HCT116 cells were determined by the TOP and FOP flash reporter assay, and the protein levels of CDX2, Cyclin D1 and PCNA were analyzed by western blot. Values are expressed as mean ± s.d, and the results are representative of three independent experiments. \*P < 0.05, \*\*P < 0.01, \*\*\*P < 0.001. (B) The detailed sequence of CDX2 silencer region and APC, AXIN2 enhancer regions were provided.
